# Supplementary material for: Fidelity of a Motivational Interviewing Intervention for Improving Return to Work for People with Musculoskeletal Disorders
Source: MDPI journal article supplement (doi:10.3390/ijerph181910324), 2021-09-30
Supplement: s1 [file s1]

**Table S1****Checklist for adherence to the MI manual based on the main themes**

| MI session 1              |                                                                                                                                          | Adherence (0-4)* |
|---------------------------|------------------------------------------------------------------------------------------------------------------------------------------|------------------|
| 1                         | Introduction of session 1 from the interviewer – the frame of the conversation                                                           |                  |
| 2                         | Agenda mapping: the sick listed person (SLP) chooses theme(s) from a sheet for agenda mapping (e.g family, mental health, economy, etc.) |                  |
| 3                         | The interviewer adapt the intervention to the sick-listed`s stage of motivation for RTW                                                  |                  |
| 4a.                       | Rating scale about the SLP`s importance of being able to work and follow-up questions                                                    |                  |
| 4b.                       | Rating scale about the SLP`s confidence in being able to work and follow-up questions                                                    |                  |
| 5                         | The interviewer provides a summary of session 1 to the SLP                                                                               |                  |
| Total score<br>(mean, SD) |                                                                                                                                          |                  |

\*0 = not at all 1= to a small degree 2= to some degree 3=to a large degree 4= to a very large degree

| MI session 2              |                                                                                                  | Adherence (0-4)* |
|---------------------------|--------------------------------------------------------------------------------------------------|------------------|
| 6                         | Introduction and summary of session 1 (previous conversation)                                    |                  |
| 7                         | Introduction to session 2 from the interviewer                                                   |                  |
| 8                         | Assess the SLP's current work situation                                                          |                  |
| 9                         | Assess the SLP's previous and / or possible work attempts                                        |                  |
| 10                        | Information on possible contributions from the Norwegian Labour and Welfare Administration (NAV) |                  |
| 11                        | Rating scale about the SLP's confidence in being able to work and follow-up questions            |                  |
| 12                        | Explore the SLP's goals and values in life                                                       |                  |
| 13                        | Scaling of readiness for RTW and follow- up questions                                            |                  |
| 14                        | Summary of both session 1 and 2 with key questions                                               |                  |
| 15                        | Intervention in the last part of the conversation adapted to the stage of motivation             |                  |
| 16                        | Thanking the participant for the conversation                                                    |                  |
| Total score<br>(mean, SD) |                                                                                                  |                  |

\*0 = not at all 1= to a small degree 2= to some degree 3=to a large degree 4= to a very large degree
